# Supplementary material for: Arterial thromboembolism in multiple myeloma in the context of modern anti-myeloma therapy
Source: PubMed Central journal article supplement (PMC8233391; doi:10.1038/s41408-021-00513-4), 2021-06-25

### 6-month Landmark Analysis: ATE vs Overall Survival

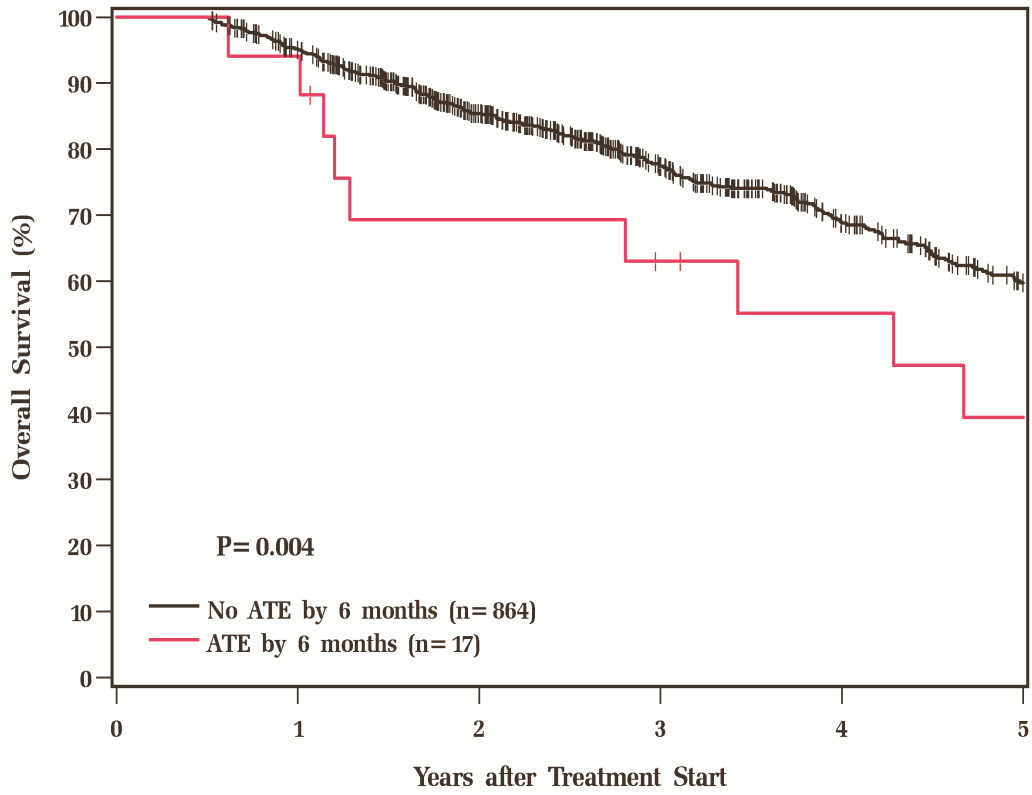

### 12-month Landmark Analysis: ATE vs Overall Survival

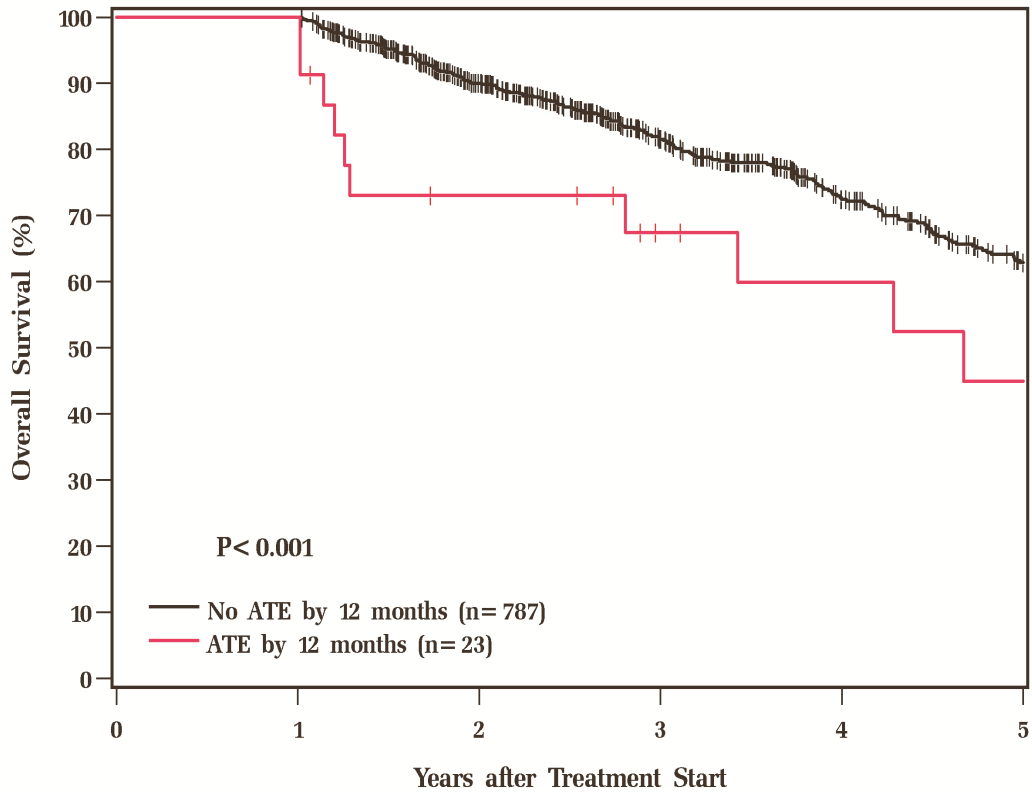

Supplement: 41408_2021_513_MOESM2_ESM.pdf [file 41408_2021_513_MOESM2_ESM.pdf]
